CORRECTION

# Correction: Enhancing Anti-Tumor Efficacy of Doxorubicin by Non-Covalent Conjugation to Gold Nanoparticles - *In Vitro* Studies on Feline Fibrosarcoma Cell Lines

Michał Wójcik, Wiktor Lewandowski, Magdalena Król, Karol Pawłowski, Józef Mieczkowski, Roman Lechowski, Katarzyna Zabielska

The images for Figs 5 and 6 are incorrectly switched. The image that appears as Fig 5 should be Fig 6, and the image that appears as Fig 6 should be Fig 5. The figure captions appear in the correct order.

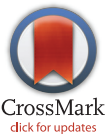

 OPEN ACCESS

**Citation:** Wójcik M, Lewandowski W, Król M, Pawłowski K, Mieczkowski J, Lechowski R, et al. (2015) Correction: Enhancing Anti-Tumor Efficacy of Doxorubicin by Non-Covalent Conjugation to Gold Nanoparticles - *In Vitro* Studies on Feline Fibrosarcoma Cell Lines. PLoS ONE 10(6): e0129639. doi:10.1371/journal.pone.0129639

**Published:** June 1, 2015

**Copyright:** © 2015 Wójcik et al. This is an open access article distributed under the terms of the [Creative Commons Attribution License](#), which permits unrestricted use, distribution, and reproduction in any medium, provided the original author and source are credited.

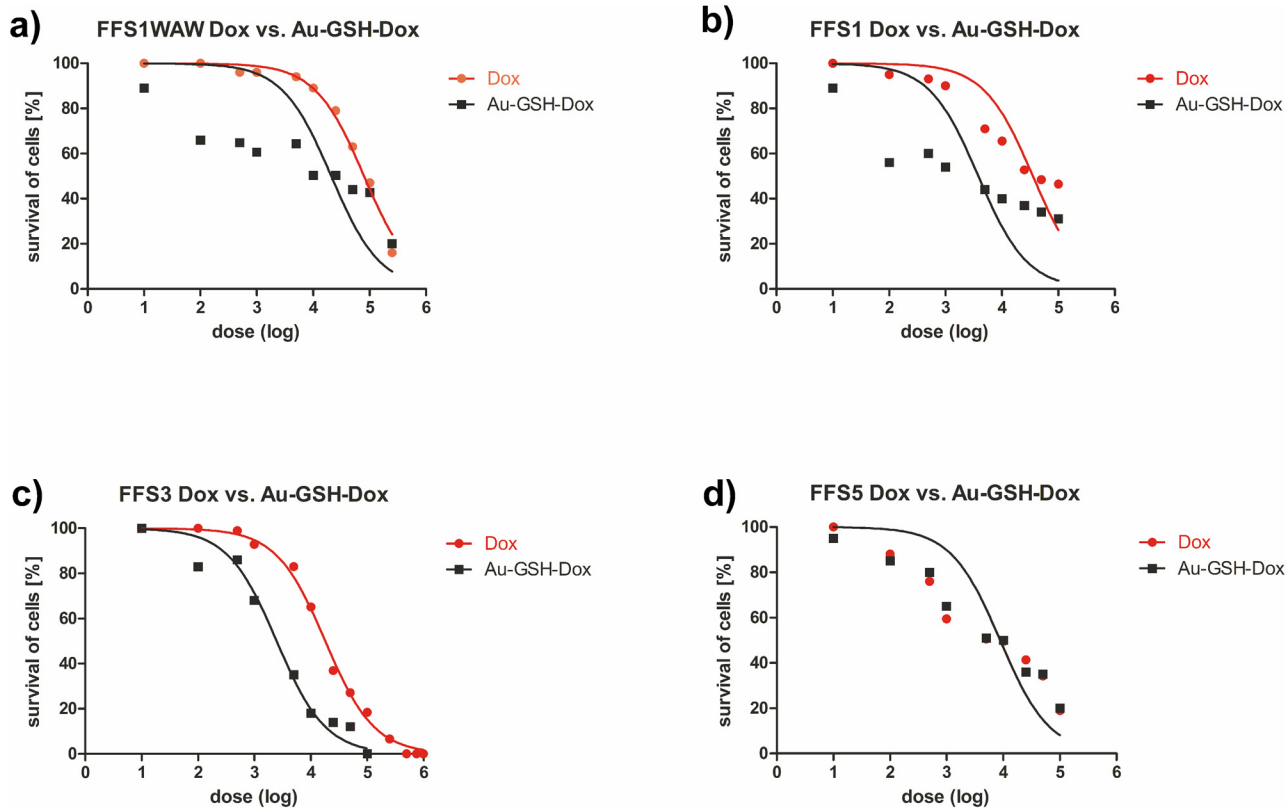

**Fig 5. Correlation between cell viability (as measured with MTT assay) and chemotherapeutic dose.** Analysis for (a) FFS1WAW, (b) FFS1, (c) FFS3 and (d) FFS5 cell lines. Red and black lines represent Dox and Au-GSH-Dox doses, respectively.

doi:10.1371/journal.pone.0129639.g001

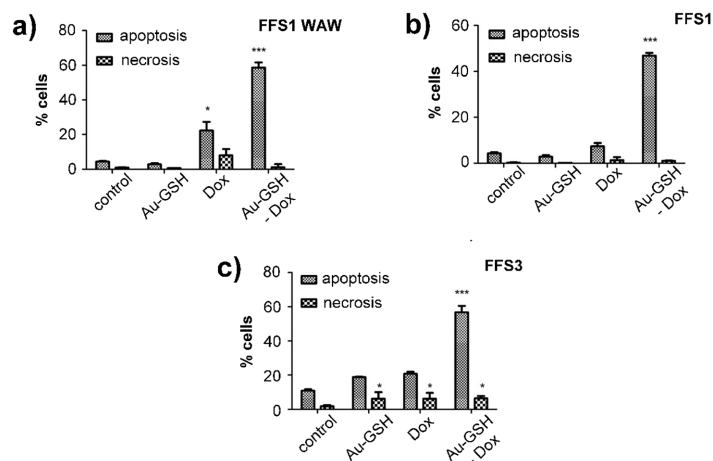

**Fig 6. The effect of tested substances (Au-GSH, Dox, Au-GSH-Dox) on apoptosis and necrosis of each cell line: (a) FFS1WAW, (b) FFS1, (c) FFS3.** Tested substances were given at concentrations based on the MTT assay results. Statistical analysis was performed using Prism version 5.00 software (GraphPad Software, USA). Unpaired t-test was used,  $p < 0,05$  was described as \*,  $p < 0,01$  was marked as \*\*,  $p < 0,001$  was marked as \*\*\*

doi:10.1371/journal.pone.0129639.g002

## Reference

1. Wójcik M, Lewandowski W, Król M, Pawłowski K, Mieczkowski J, Lechowski R, et al. (2015) Enhancing Anti-Tumor Efficacy of Doxorubicin by Non-Covalent Conjugation to Gold Nanoparticles—*In Vitro* Studies on Feline Fibrosarcoma Cell Lines. PLoS ONE 10(4): e0124955. doi: [10.1371/journal.pone.0124955](https://doi.org/10.1371/journal.pone.0124955) PMID: [25928423](https://pubmed.ncbi.nlm.nih.gov/25928423/)
